# Supplementary material for: Facile preparation of hydrated vanadium pentoxide nanobelts based bulky paper as flexible binder-free cathodes for high-performance lithium ion batteries
Source: Royal Society of Chemistry journal article supplement (doi:10.1039/c1ra00281c), 2011-01-01
Supplement: c1ra00281c.pdf [file c1ra00281c.pdf]

Supporting information for

## **Facile Preparation of Hydrated Vanadium Pentoxide Nanobelts Based Bulky Paper as Flexible Binder-free Cathodes for High-performance Lithium Ion batteries**

Xianhong Rui,<sup>a,b</sup> Jixin Zhu,<sup>a</sup> Weiling Liu,<sup>a</sup> Huiteng Tan,<sup>a</sup> Daohao Sim,<sup>a</sup> Chen Xu,<sup>a</sup> Hua Zhang,<sup>a</sup> Huey Hoon Hng,<sup>a</sup> Tuti Mariana Lim<sup>b,d,\*</sup> and Qingyu Yan<sup>a,c,\*</sup>

<sup>a</sup>School of Materials Science and Engineering, Nanyang Technological University, 639798, Singapore

<sup>b</sup>School of Civil and Environmental Engineering, Nanyang Technological University, 639798, Singapore

<sup>c</sup>Energy Research Institute, Nanyang Technological University, 637459, Singapore

<sup>d</sup>School of Life Sciences and Chemical Technology, Ngee Ann Polytechnic, 599489, Singapore

\* Corresponding author. Tel: +65-6790 4583, Fax: +65 6790 9081

E-mail addresses: [Alexyan@ntu.edu.sg](mailto:Alexyan@ntu.edu.sg) (Qingyu Yan), [tlim@ntu.edu.sg](mailto:tlim@ntu.edu.sg) (Tuti Mariana)

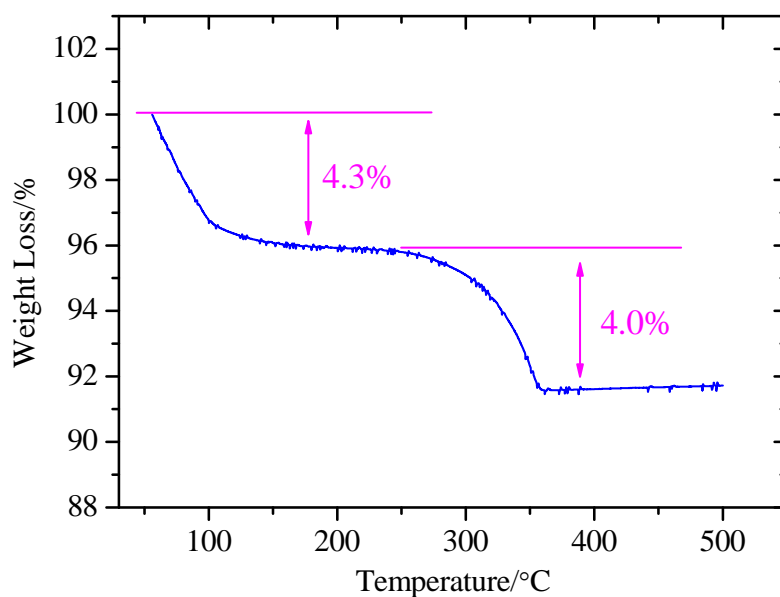

**Figure S1.** Weight loss curve with respect to temperature (°C) for the as-prepared product in the presence of 1.5 mM  $\text{NH}_4\text{H}_2\text{PO}_4$ .

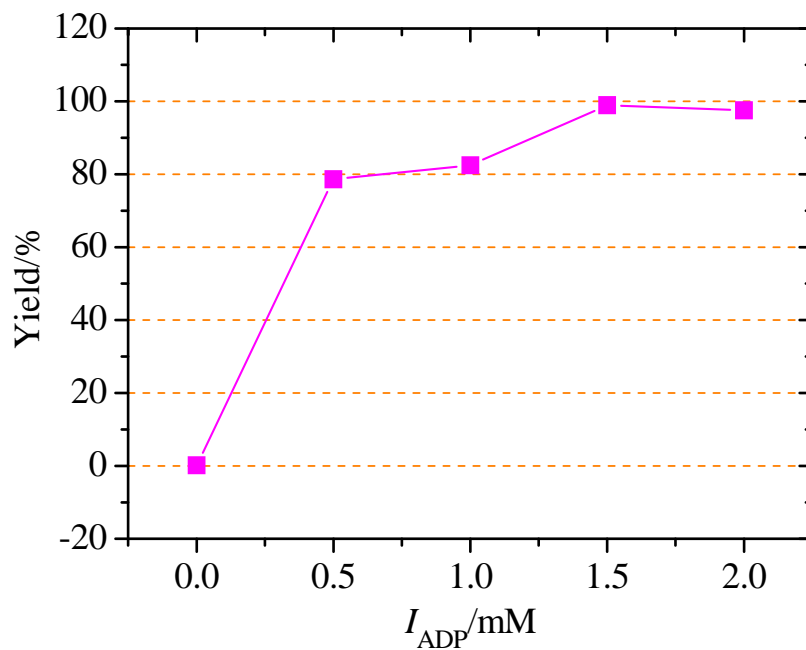

**Figure S2.** A relationship of yields of dried products to different ADP concentrations ( $I_{\text{ADP}}$ ), ignoring the weight loss during the water and ethanol washing processes.

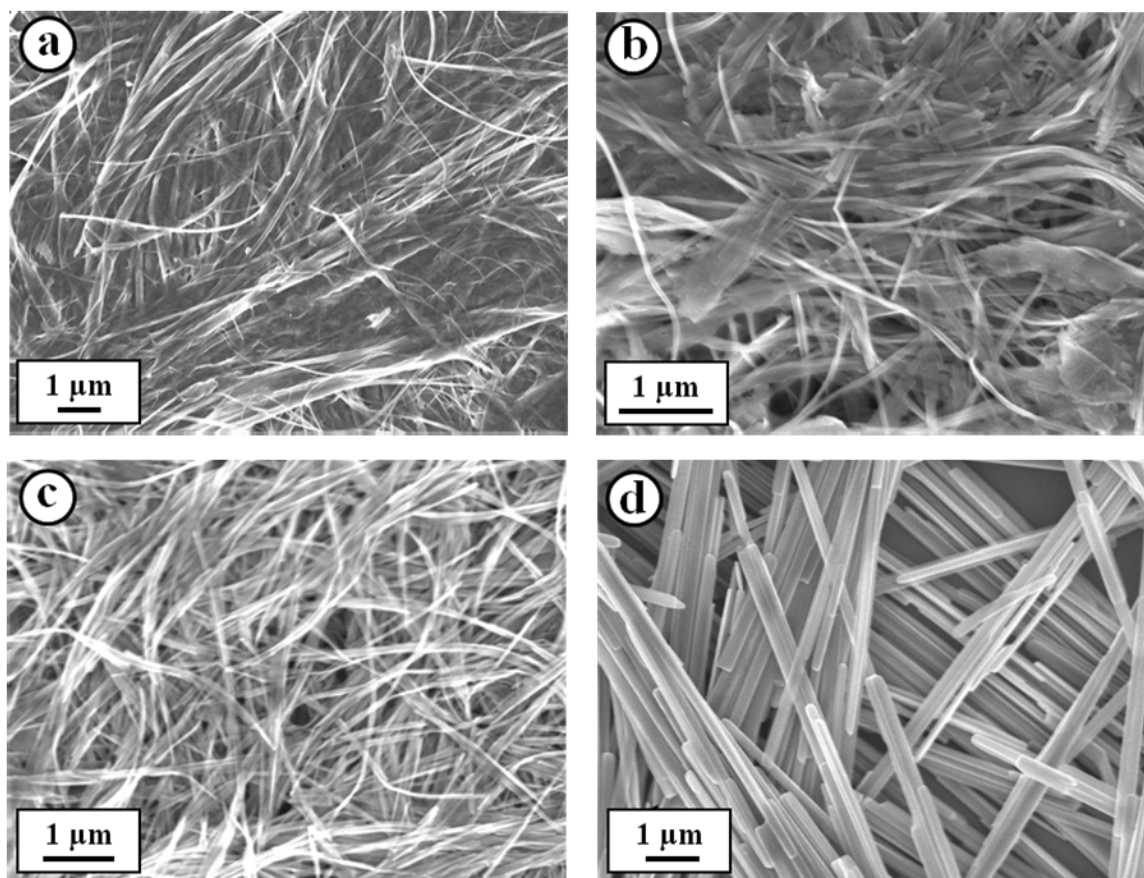

**Figure S3.** FESEM images of products synthesized by hydrothermal reactions at 180 °C for 48 h with different ADP concentrations. (a) 0.0 mM, (b) 0.5 mM, (c) 1.0 mM and (d) 2.0 mM.

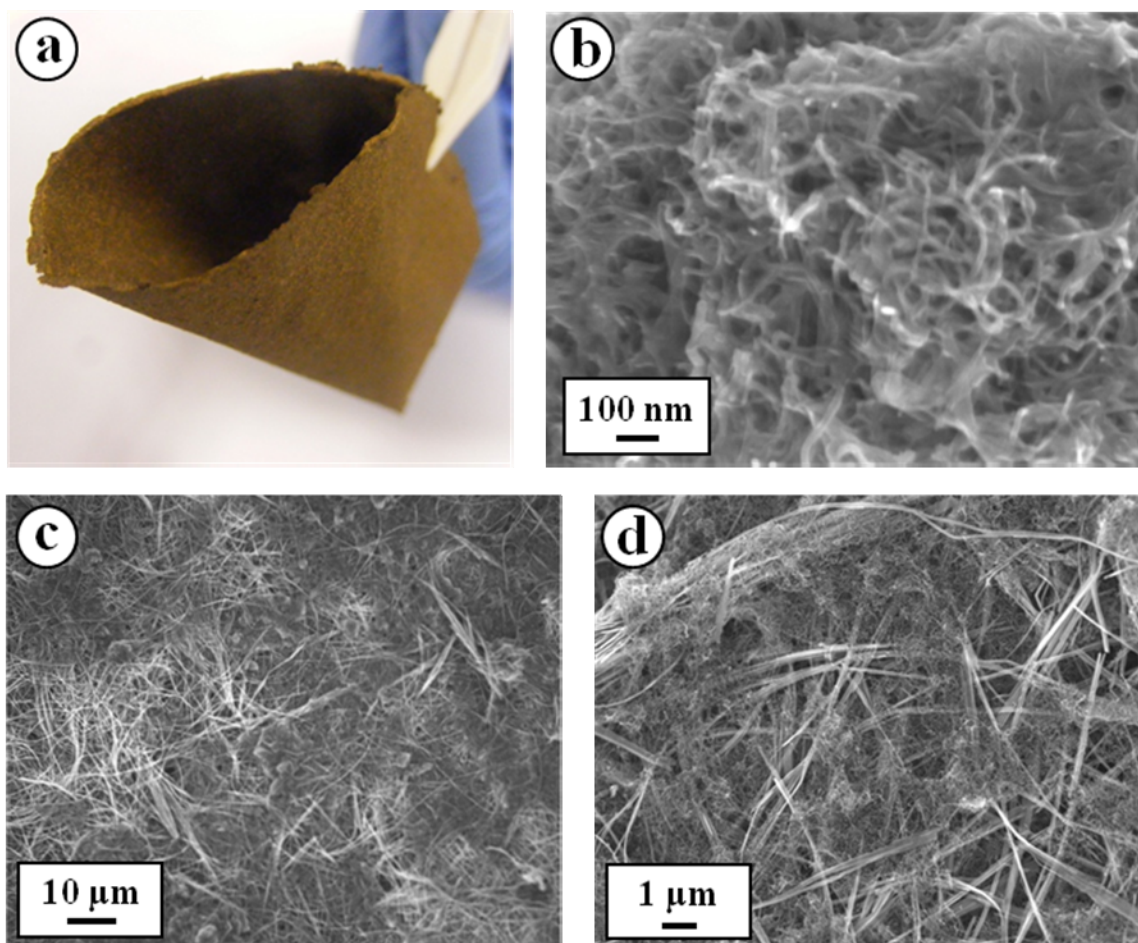

**Figure S4.** (a) Digital photograph of a free-standing HVO bulky paper with 25 wt% acid-treated MWCNTs as conductive additives to improve cathode's electrical conductivity. (b) FESEM image of acid-treated MWCNTs, revealing a network of entangled CNTs with diameters of around 20-30 nm and lengths up to the micrometer scale. Low- (c) and high-resolution (d) FESEM images of above bulky paper, indicating a uniform mixture of the MWCNTs and HVO nanobelts.

**Table S1.** A comparison of our C-rate results to other reported V<sub>2</sub>O<sub>5</sub> based electrodes. All data are the 2<sup>nd</sup> discharge capacities.

| <div>Samples</div> <div>Current density</div> | Ours                    | Ref. 29                | Ref. 31                 | Ref. 32                 | Ref. 33                 | Ref. 34                 |
|-----------------------------------------------|-------------------------|------------------------|-------------------------|-------------------------|-------------------------|-------------------------|
| 735 mA g <sup>-1</sup>                        |                         | 92 mAh g <sup>-1</sup> |                         |                         |                         |                         |
| 1000 mA g <sup>-1</sup>                       | 183 mAh g <sup>-1</sup> |                        |                         |                         | 192 mAh g <sup>-1</sup> |                         |
| 2000 mA g <sup>-1</sup>                       | 163 mAh g <sup>-1</sup> |                        |                         |                         |                         |                         |
| 2060 mA g <sup>-1</sup>                       |                         |                        | 117 mAh g <sup>-1</sup> |                         |                         |                         |
| 2352 mA g <sup>-1</sup>                       |                         |                        |                         | 148 mAh g <sup>-1</sup> |                         | 200 mAh g <sup>-1</sup> |
